# Supplementary material for: Effects of 3-Hydroxy-3-methylglutaryl-CoA Reductase Inhibitors on Cholesterol Metabolism in Laying Hens
Source: MDPI journal article supplement (doi:10.3390/ani13111868), 2023-06-03
Supplement: s1 [file s1]

**Supplementary Table S1.** Composition of basal diets and nutrient levels.

| Ingredients         | Percentage (%) | Nutrient level           | Content |
|---------------------|----------------|--------------------------|---------|
| Wheat               | 68.40          | ME (kcal/kg)             | 2750    |
| Soybean meal        | 15.00          | Crude protein (%)        | 16.50   |
| Soybean oil         | 1.30           | Calcium (%)              | 3.60    |
| DDGS                | 3.00           | Available phosphorus (%) | 0.35    |
| Limestone           | 9.00           | Met (%)                  | 0.35    |
| CaHPO <sub>4</sub>  | 0.80           | Lys (%)                  | 0.80    |
| Bran                | 1.00           | Met + Cys (%)            | 0.70    |
| Premix <sup>1</sup> | 1.50           |                          |         |

<sup>1</sup>The premix provided the following per kg of diet: vitamin A, 15,000 IU; cholecalciferol 4,000 IU; vitamin E, 50 mg; thiamine, 3.60 mg; riboflavin, 10 mg; pyridoxine, 5.5 mg; iron, 100 mg; manganese, 110 mg; copper, 10 mg; zinc, 100 mg; selenium, 0.4 mg; iodine, 0.3 mg.

**Supplementary Table S2.** Primers for PCR<sup>1</sup>.

| Gene name      | Accession      | Primer sequence (5'-3')                             | Product size (bp) | Amplification efficiency (%) |
|----------------|----------------|-----------------------------------------------------|-------------------|------------------------------|
| <i>HMGCR</i>   | NM_204485.3    | F: AGGAGCTTGCTGTGAAAACG<br>R: AAGCTTTCACCTCTGCAGCC  | 254               | 99.7                         |
| <i>MVK</i>     | XM_015275510.4 | F: TCGGGTGTGGATAATGCTGT<br>R: CCAGAACACTTTGGCACTCC  | 238               | 98.6                         |
| <i>FDPS</i>    | NM_001396601.1 | F: AGGAGTTCGTGGGGTTCTTC<br>R: AACAACTCGATGCACCAACC  | 241               | 98.3                         |
| <i>FDFT1</i>   | NM_001039294.2 | F: AAGGTCCCGATGCTGAATGA<br>R: AGAGAAGAGTCGGGAAAGGC  | 288               | 99.8                         |
| <i>SQLE</i>    | NM_001194927.2 | F: TTGTGGGTTCAGGTGTCCTT<br>R: CCTCCGACTTGCTCTCTAGG  | 234               | 99.5                         |
| <i>VLDLR</i>   | NM_205229.2    | F: AAGGACTGGAGTGATGAGCC<br>R: GTTCTTTCCCCACAGCCTTG  | 289               | 99.2                         |
| <i>β-actin</i> | NM_205518.2    | F: AGTACCCCATTTGAACACGGT<br>R: ATACATGGCTGGGGTGTGTA | 197               | 98.5                         |

<sup>1</sup> Abbreviation represents: *HMGCR*, 3-hydroxy-3-methylglutaryl-CoA reductase; *MVK*, mevalonate kinase; *FDPS*, farnesyl diphosphate synthase; *FDFT1*, farnesyl-diphosphate farnesyltransferase 1; *SQLE*, squalene epoxidase; *VLDLR*, very low density lipoprotein receptor; *β-actin*, actin beta.
